# Supplementary material for: Biochemical and Elemental Composition of Pelagic Sargassum Biomass Harvested across the Caribbean
Source: MDPI journal article supplement (doi:10.3390/phycology2010011), 2022-03-11
Supplement: s1 [file s1]

**Supplementary Table S1.** Monosaccharide composition in the non-cellulosic fraction of pelagic *Sargassum* biomass harvested at different locations in the Caribbean.

|                                    |                      | Mexico<br>(July 2020) | Mexico<br>(January 2021) | Dominican Republic<br>(February 2021) | Jamaica<br>(August 2020) | Jamaica<br>(February 2019) |
|------------------------------------|----------------------|-----------------------|--------------------------|---------------------------------------|--------------------------|----------------------------|
| <i>Neutral<br/>monosaccharides</i> | Mannitol             | 0.88 ± 0.13           | 0.85 ± 0.34              | 2.22 ± 1.82                           | 18.89 ± 0.38             | 1.62 ± 0.86                |
|                                    | Fucose               | 14.37 ± 1.35          | 18.29 ± 0.29             | 18.99 ± 1.40                          | 13.90 ± 0.46             | 17.27 ± 2.29               |
|                                    | Arabinose            | 0.71 ± 0.17           | 3.30 ± 0.52              | 1.20 ± 0.28                           | 1.32 ± 0.11              | 1.26 ± 0.23                |
|                                    | Rhamnose             | 0.89 ± 0.03           | 2.17 ± 0.17              | 1.21 ± 0.12                           | 0.64 ± 0.07              | 1.54 ± 0.32                |
|                                    | Galactose            | 6.31 ± 0.62           | 6.94 ± 0.78              | 9.91 ± 1.14                           | 6.43 ± 0.34              | 12.41 ± 1.29               |
|                                    | Glucose              | 3.36 ± 0.14           | 5.26 ± 0.27              | 4.29 ± 2.45                           | 5.65 ± 0.29              | 5.40 ± 0.89                |
|                                    | Xylose               | 5.73 ± 0.69           | 5.15 ± 0.25              | 8.83 ± 0.36                           | 3.92 ± 0.23              | 5.50 ± 1.07                |
|                                    | Mannose              | 1.15 ± 0.15           | 2.03 ± 0.23              | 0.80 ± 0.09                           | 2.44 ± 0.02              | 4.58 ± 0.21                |
| <i>Uronic acids</i>                | Galacturonic<br>Acid | 3.16 ± 0.41           | 0.54 ± 0.06              | 5.11 ± 0.96                           | 0.08 ± 0.02              | 0.61 ± 0.32                |
|                                    | Glucuronic<br>Acid   | 0.40 ± 0.03           | 20.75 ± 2.07             | 0.55 ± 0.11                           | 13.78 ± 1.41             | 8.71 ± 2.55                |
|                                    | Guluronic<br>Acid    | 1.95 ± 0.40           | 16.18 ± 2.48             | 3.30 ± 0.27                           | 19.37 ± 1.66             | 47.24 ± 14.60              |
|                                    | Mannuronic<br>Acid   | 11.66 ± 2.66          | 50.05 ± 6.26             | 21.33 ± 1.02                          | 50.45 ± 3.65             | 87.83 ± 31.54              |
| Total                              |                      | 50.54 ± 5.28          | 131.51 ± 11.75           | 77.75 ± 2.46                          | 136.85 ± 8.25            | 193.98 ± 55.05             |

Results are expressed as mg / g of biomass DW. Values for Jamaica (February 2019) have been reported by Davis et al. (2021) [10].
