# Supplementary material for: Biochemical and Elemental Composition of Pelagic Sargassum Biomass Harvested across the Caribbean
Source: MDPI journal article supplement (doi:10.3390/phycology2010011), 2022-03-11
Supplement: s1 [file s1]

**Supplementary Table S2.** Monosaccharide composition in the non-cellulosic fraction of pelagic *Sargassum* biomass harvested at different locations in the Caribbean.

|                                    |                   | Mexico<br>(July 2020) | Mexico<br>(January 2021) | Dominican Republic<br>(February 2021) | Jamaica<br>(August 2020) | Jamaica<br>(February 2019) |
|------------------------------------|-------------------|-----------------------|--------------------------|---------------------------------------|--------------------------|----------------------------|
| <i>Neutral<br/>monosaccharides</i> | Mannitol          | 1.77 ± 0.45           | 0.65 ± 0.30              | 2.85 ± 2.32                           | 13.84 ± 0.91             | 0.83 ± 0.42                |
|                                    | Fucose            | 28.45 ± 0.79          | 13.97 ± 1.08             | 24.43 ± 1.82                          | 10.17 ± 0.40             | 9.37 ± 1.80                |
|                                    | Arabinose         | 1.44 ± 0.52           | 2.54 ± 0.58              | 1.54 ± 0.32                           | 0.96 ± 0.04              | 0.71 ± 0.22                |
|                                    | Rhamnose          | 1.77 ± 0.25           | 1.66 ± 0.25              | 1.55 ± 0.11                           | 0.46 ± 0.04              | 0.83 ± 0.23                |
|                                    | Galactose         | 12.49 ± 0.47          | 5.28 ± 0.27              | 12.74 ± 1.19                          | 4.71 ± 0.21              | 6.76 ± 1.37                |
|                                    | Glucose           | 6.71 ± 0.94           | 4.01 ± 0.19              | 5.48 ± 3.00                           | 4.13 ± 0.16              | 2.89 ± 0.42                |
|                                    | Xylose            | 11.33 ± 0.52          | 3.93 ± 0.24              | 11.36 ± 0.43                          | 2.86 ± 0.03              | 2.92 ± 0.37                |
|                                    | Mannose           | 2.29 ± 0.31           | 1.54 ± 0.06              | 1.03 ± 0.14                           | 1.79 ± 0.12              | 2.38 ± 0.16                |
| <i>Uronic acids</i>                | Galacturonic Acid | 6.24 ± 0.38           | 0.41 ± 0.09              | 6.56 ± 1.13                           | 0.06 ± 0.02              | 0.30 ± 0.13                |
|                                    | Glucuronic Acid   | 0.79 ± 0.08           | 15.77 ± 0.26             | 0.71 ± 0.12                           | 10.04 ± 0.54             | 4.49 ± 0.36                |
|                                    | Guluronic Acid    | 3.84 ± 0.54           | 12.25 ± 0.83             | 4.25 ± 0.47                           | 14.13 ± 0.48             | 24.19 ± 0.90               |
|                                    | Mannuronic Acid   | 22.88 ± 3.26          | 37.97 ± 1.59             | 27.47 ± 2.09                          | 36.84 ± 0.75             | 44.32 ± 3.65               |

Results are expressed as % of biomass DW. Values for Jamaica (February 2019) have been reported by Davis et al. (2021) [10].
